# Supplementary material for: Effects of Supplements Differing in Fatty Acid Profile to Late Gestational Beef Cows on Steer Progeny Finishing Phase Growth Performance, Carcass Characteristics, and mRNA Expression of Myogenic and Adipogenic Genes
Source: MDPI journal article supplement (doi:10.3390/ani11071904), 2021-06-26
Supplement: s1 [file s1]

Table S1. qPCR performance of the genes analyzed in *Longissimus* muscle.

| Gene <sup>1</sup> | Median Ct <sup>2</sup> | Median $\Delta$ Ct <sup>3</sup> | Slope <sup>4</sup> | (R <sup>2</sup> ) <sup>5</sup> | Efficiency <sup>6</sup> | Relative mRNA abundance <sup>7</sup> |
|-------------------|------------------------|---------------------------------|--------------------|--------------------------------|-------------------------|--------------------------------------|
| <i>MYOG</i>       | 23.845                 | 6.5435                          | -3.48              | 0.987                          | 1.937                   | 0.0132                               |
| <i>MYOD1</i>      | 23.943                 | 6.6706                          | -3.43              | 0.988                          | 1.958                   | 0.0113                               |
| <i>PAX7</i>       | 29.550                 | 12.2835                         | -3.25              | 0.993                          | 2.032                   | 0.0002                               |
| <i>MYF5</i>       | 26.935                 | 9.6754                          | -3.22              | 0.995                          | 2.045                   | 0.0010                               |
| <i>MYH1</i>       | 15.355                 | -2.9116                         | -3.28              | 0.992                          | 2.019                   | 7.7358                               |
| <i>MYH2</i>       | 16.995                 | -1.2911                         | -3.25              | 0.999                          | 2.031                   | 2.4961                               |
| <i>MYH7</i>       | 16.173                 | -1.0751                         | -3.41              | 0.997                          | 1.965                   | 2.0676                               |
| <i>MEF2C</i>      | 25.195                 | 7.0340                          | -3.49              | 0.994                          | 1.935                   | 0.0096                               |
| <i>AGPAT1</i>     | 26.992                 | 9.7029                          | -3.19              | 0.990                          | 2.059                   | 0.0009                               |
| <i>PPARGC1A</i>   | 25.538                 | 8.2646                          | -3.41              | 0.990                          | 1.965                   | 0.0038                               |
| <i>PPARG</i>      | 27.927                 | 10.6139                         | -3.43              | 0.989                          | 1.958                   | 0.0008                               |
| <i>ZFP423</i>     | 24.021                 | 6.8094                          | -3.55              | 0.987                          | 1.913                   | 0.0121                               |
| <i>CEBPA</i>      | 26.395                 | 7.6611                          | -3.19              | 0.992                          | 2.056                   | 0.0040                               |
| <i>CEBPB</i>      | 27.030                 | 8.2960                          | -3.35              | 0.995                          | 1.989                   | 0.0033                               |
| <i>FABP4</i>      | 21.913                 | 3.4202                          | -3.19              | 0.991                          | 2.057                   | 0.0848                               |

<sup>1</sup>*MYOG* Myogenin, *MYOD1* Myogenic differentiation 1, *PAX7* Paired box protein 7, *MYF5* Myogenic factor 5, *MYH1* Myosin heavy chain 1, *MYH2* Myosin heavy chain 2, *MYH7* Myosin heavy chain 7, *MEF2C* Myocyte enhancer factor 2C, *AGPAT1* Acyl-glycerol phosphate acyltransferase 1, *PPARGC1A* PPARG coactivator 1 alpha, *PPARG* Peroxisome proliferator activated receptor gamma, *ZFP423* Zinc finger protein 423, *C/EBPA* CCAAT enhancer binding protein alpha, *C/EBPB* CCAAT enhancer binding protein beta, *FABP4* Fatty acid binding protein 4. <sup>2</sup>The median is calculated considering all steers. <sup>3</sup>The median of  $\Delta$ Ct is calculated as [Ct gene – geometrical mean of Ct internal controls] for each steer. <sup>4</sup>Slope of the standard curve. <sup>5</sup>R<sup>2</sup> stands for the coefficient of determination of the standard curve. <sup>6</sup>Efficiency is calculated as  $[10(-1 / \text{Slope})]$ . <sup>7</sup>Relative mRNA abundance =  $1 / \text{Efficiency Median } \Delta\text{Ct}$

Table S2. qPCR performance of the genes analyzed in subcutaneous adipose tissue

| Gene <sup>1</sup> | Median Ct <sup>2</sup> | Median $\Delta$ Ct <sup>3</sup> | Slope <sup>4</sup> | (R <sup>2</sup> ) <sup>5</sup> | Efficiency <sup>6</sup> | Relative mRNA Abundance <sup>7</sup> |
|-------------------|------------------------|---------------------------------|--------------------|--------------------------------|-------------------------|--------------------------------------|
| <i>FASN</i>       | 16.948                 | -3.2600                         | -3.37              | 0.999                          | 1.981                   | 9.2823                               |
| <i>SREBP1</i>     | 22.131                 | 1.9597                          | -3.22              | 0.983                          | 2.045                   | 0.2461                               |
| <i>PPARG</i>      | 23.709                 | 3.6456                          | -3.39              | 0.998                          | 1.974                   | 0.0839                               |
| <i>ADFP</i>       | 21.908                 | 1.5577                          | -3.45              | 0.990                          | 1.948                   | 0.3539                               |
| <i>SCD</i>        | 15.892                 | -4.5701                         | -3.55              | 0.992                          | 1.913                   | 19.3803                              |
| <i>FABP4</i>      | 16.304                 | -3.8287                         | -3.40              | 0.992                          | 1.969                   | 13.3892                              |
| <i>PPARGC1A</i>   | 28.331                 | -4.5180                         | -3.30              | 0.981                          | 2.011                   | 23.4826                              |
| <i>ZFP423</i>     | 23.849                 | 3.2014                          | -3.55              | 0.983                          | 1.914                   | 0.1251                               |
| <i>ACACA</i>      | 20.851                 | 0.5347                          | -3.53              | 0.995                          | 1.921                   | 0.7053                               |
| <i>CEBPA</i>      | 23.241                 | 3.2014                          | -3.20              | 0.996                          | 2.056                   | 0.0995                               |
| <i>CEBPB</i>      | 26.974                 | 6.7941                          | -3.44              | 0.990                          | 1.952                   | 0.0106                               |

<sup>1</sup>*FASN* Fatty acid synthase, *SREBP1* Sterol regulatory element binding transcription factor 1, *ADFP* Adipose differentiation-related protein, *SCD* Stearoyl-CoA desaturase, *ACACA* Acetyl-CoA carboxylase alpha. <sup>2</sup>The median is calculated considering all steers. <sup>3</sup>The median of  $\Delta$ Ct is calculated as [Ct gene – geometrical mean of Ct internal controls] for each steer. <sup>4</sup>Slope of the standard curve. <sup>5</sup>R<sup>2</sup> stands for the coefficient of determination of the standard curve. <sup>6</sup>Efficiency is calculated as  $[10(-1 / \text{Slope})]$ . <sup>7</sup>Relative mRNA abundance =  $1 / \text{Efficiency Median } \Delta\text{Ct}$
